## **Rapid generation of conditional knockout mice using the CRISPR-CAS9 system and electroporation for neuroscience research**

Hirofumi Nishizono<sup>1,2,\*†</sup>, Yuki Hayano<sup>2,\*</sup>, Yoshihisa Nakahata<sup>2</sup>, Yasuhito Ishigaki<sup>1</sup> and Ryohei Yasuda<sup>2,†</sup>

<sup>1</sup> Research Support Center, Kanazawa Medical University, 1-1 Daigaku, Uchinada, Kahoku, Ishikawa 920-0293, Japan

<sup>2</sup> Max Planck Florida Institute for Neuroscience, 1 Max Planck Way, Jupiter, Florida 33458, USA

\* These authors contributed equally.

† Correspondence:

Hirofumi Nishizono

Kanazawa Medical University, 1-1 Daigaku, Uchinada, Kahoku, Ishikawa 920-0293, Japan

Email: [hirofumi@kanazawa-med.ac.jp](mailto:hirofumi@kanazawa-med.ac.jp)

Ryohei Yasuda

Max Planck Florida Institute for Neuroscience, 1 Max Planck Way, Jupiter, FL 33458, USA

Email: [ryohei.yasuda@mpfi.org](mailto:ryohei.yasuda@mpfi.org)

1 **Abstract**

2 The Cre/Loxp-based conditional knockout technology is a powerful tool for gene function  
3 analyses by allowing region-time-specific gene manipulation. However, inserting a pair of  
4 LoxP cassettes for generating conditional knock-out can be technically challenging and  
5 thus time- and resource-consuming. This study proposes an efficient, low-cost method to  
6 generate floxed mice using the in vitro fertilization and the CRISPR-Cas9 system over two  
7 consecutive generations. This method allowed us to produce floxed mice targeting exon 5  
8 to exon 6 of CaMK1 in a short period, 125 days, using only 16 mice. The efficiency of  
9 generating floxed mice was 10%, significantly higher than the conventional ES cell-based  
10 method. We directly edited the genome of C57BL/6N fertilized eggs, our target genetic  
11 background, to eliminate additional backcrossing steps. We confirmed that the genome of  
12 this floxed mouse is responsive to Cre protein. This low-cost, highly efficient method for  
13 generating conditional knock-out will facilitate comprehensive, tissue-specific genome  
14 analyses.

15

16 **Keyword (3 to 5 words)**

17 Cre/Loxp, floxed mouse, CRISPR-CAS9, genome editing, CaMK1

18

19 **Main Text**

20 The invention of ES cell-based gene targeting technology in mice and conditional knockout  
21 systems using Cre/Loxp have led to breakthroughs in neuroscience [1, 2]. These  
22 technologies have allowed researchers to analyze gene function in a region-specific or  
23 time-specific manner. However, in the past, the generation of gene-modified mice  
24 required a long time and advanced technology [3, 4]. Injection of DNA donor into a  
25 fertilized egg's pronucleus using microinjection required highly skilled personnel and  
26 expensive equipment and had suffered from a low success rate. Furthermore, the  
27 requirement of backcrossing after the generation of chimeric mice further slows the  
28 production cycle. Recently, the development of genome editing technology for fertilized  
29 eggs combined with electroporation and the CRISPR-Cas9 system (TAKE and iGONAD) has  
30 made it possible to generate gene-modified mice easily and with a high success rate using  
31 inexpensive equipment [5–7]. However, electroporation permits only short (1kb or less)  
32 single-stranded DNA donors to be introduced into the nucleus [8]. Thus, while the  
33 electroporation-based method allows for the efficient development of the knock-in of a  
34 relatively short tag, it is not suitable for creating conditional knockout mice for the  
35 deletion of a long genomic region such as LoxP- multiple exons-LoxP cassettes.

36 A research group has recently proposed solutions to the problem of DNA donor size  
37 limitation [9]. This method, Easi-CRISPR, can efficiently insert relatively long transgene  
38 into the genome of mouse fertilized eggs using long single-strand DNA (ssDNA) as a DNA  
39 donor. The use of long synthesized long ssDNA and CRISPR ribonucleoproteins (ctRNPs) is  
40 a unique feature of this method. However, this approach does not allow researchers to

41 generate floxed mice for deleting regions larger than 1.5 kb. Another problem is that long  
42 ssDNA is often challenging and expensive to synthesize. Other research groups have  
43 reported that it is possible to introduce LoxP sequences on the 5' and 3' sides by  
44 sequential electroporation two times during the fertilized egg's embryonic development  
45 [10, 11]. This method could theoretically be used even if the region to be knocked out is  
46 more than 1.5 kb using only electroporation. However, it has been difficult to reproduce  
47 this method in a large-scale replication study with multiple experimental facilities [12]. We  
48 also conducted a replication study, but the results were the same (data not shown).

49 As a compromise between the simplicity and the time-cost of generating conditional  
50 knockout mice with more than 1.5 kb, we tried to generate conditional knockout mice  
51 through two generations (Fig 1. A and B). Exon 5 and exon 6 of Ca<sup>2+</sup>/calmodulin-  
52 dependent protein kinase 1 (CaMK1) [13] were designed to be knocked out under Cre  
53 recombinant expression. Briefly, a DNA donor containing a LoxP and a homology arm (5'  
54 LoxP) is knocked into the upstream intron of exon 5. A similar short construct is also  
55 inserted into the downstream intron of exon 6 (3' LoxP). These two DNA donors are single-  
56 stranded oligo donors (ssODNs) of less than 200 bases each, and thus they can be  
57 transferred into the pronucleus of the fertilized eggs by electroporation. First, we  
58 knocked-in 5' LoxP into C57BL/6 mouse embryos and then transferred the embryos to  
59 pseudopregnant females. When the resulting 5' LoxP-bearing mice are 6 to 8 weeks old,  
60 we performed a second round of in vitro fertilization (IVF) using their sperm with wild-  
61 type oocytes. The fertilized eggs carrying 5' LoxP were then electroporated with a 3' LoxP

62 DNA donor together with gRNA and Cas9 protein. The electroporation was performed as  
63 described in our previous paper [14]. As a result, four mice carrying both 5' and 3' LoxP  
64 were born among ten mice in the second round of IVF. Note that when introducing 5' and  
65 3' LoxP separately in two rounds of genome editing, it is necessary to confirm that both  
66 DNA donors are inserted into the same allele. Therefore, the long PCR in Fig. 1C was  
67 performed using PCR primers, including both LoxP sites (Fig. 1A). This result shows that  
68 both LoxPs are introduced into the same allele in one of the mice. The sequencing results  
69 indicate that LoxP is introduced in the correct position and direction (Fig. 1D).

70 The efficiency of this method for generating floxed mice is summarized in Fig. 1E.  
71 The first round of IVF and electroporation produced four mice, three of which had 5' LoxP.  
72 In the second round of genome editing, ten mice were born, and 4 of them had both 5'  
73 and 3' LoxP. Of these, one was a floxed mouse that had both Loxps in the same allele.  
74 There was no mouse with 3' LoxP alone. These results indicate that each genome editing  
75 treatment was efficiently introduced ssODN into the genome. The second genome editing  
76 produced floxed mice with a 10% success rate, much more efficient than previous DNA  
77 microinjection-based methods (2 to 5%) [3, 15]. The number of wild-type C57BL/6N  
78 female mice used in these experiments was 7 in the first round and 9 in the second round.  
79 Thus, we succeeded in creating a new floxed line with fewer than 20 mice using this  
80 method. Theoretically, the time required could be as short as three months, but it took  
81 125 days in practice, as shown in Fig. 1C. Even so, it is possible to produce the desired  
82 floxed mice in a remarkably short time. When the CaMK1 floxed mouse genome was

83 treated with recombinant Cre protein in a cell-free assay, the electrophoresis pattern was  
84 changed only in the presence of Cre protein, as shown in Fig. 1F. This result indicates that  
85 the genome of the generated CaMk1 floxed mice can induce a conditional knockout with  
86 Cre protein. We genome-edited C57BL/6N fertilized eggs, the genetic background of  
87 interest, so no backcrossing was required. For some sensitive assay, backcrossing with  
88 wild-type C57BL/6N may be necessary to eliminate potential off-target genome editing.

89 We have shown that it is possible to generate new floxed mice from as few as 16  
90 mice in as little as 125 days. While how general the described approach is for other genes  
91 and species required to be followed up, we believe that our method will provide a highly  
92 efficient and cost-effective means to develop new conditional knock-in mice for many  
93 different genes in the future.

94

95

96

## 97 **Materials and Methods**

### 98 **Animals**

99 Mice aged 8 to 12 weeks with the target genetic background, C57BL/6N, were used for the  
100 experiment (Charles River, Wilmington, MA). Animals were maintained under a 12:12-h  
101 light: dark cycle at  $22 \pm 2^\circ\text{C}$  and relative humidity of 40–60% with access to chow and  
102 water *ad libitum*.

103

## 104 **Genome Editing**

105 Genome editing was performed using the same method as in our previous paper. Our  
106 modification for this study was the use of fresh in vitro fertilized eggs instead of frozen  
107 embryos. Two crRNAs (5'-tatgcaccaggggacggcaatgg-3'  
108 UAUGCACCAGGGGACGGCAAGUUUUAGAGCUAUGCU for 5' Loxp, 5'-  
109 ggtgtgatccggttaggtgtgg -3' GGUGUGAUCCGGUUUAGGUGGUUUUAGAGCUAUGCU for 3'  
110 Loxp) and one tracrRNA were used in the experiment. Two types of ssODNs, 5'-  
111 ctgcacgacctgggcattgtgcaccgggatctcaaggtaggatctgagggcctagtgaactatatgcaccaggggacggcaat  
112 ATAACTTCGTATAGCATAACATTATACGAAGTTATggcaatctctgtctgtcctgtcttctgtctttgagtacctctc  
113 agcccctcactaaagccctagctttccatttgcga-3' and 5'-  
114 tcacttcagatagtagcaaggccctttaggtgtgtaaaatctgagtggttttagccagtttaggtgtgatccggttaggtgtgAT  
115 AACTTCGTATAGCATAACATTATACGAAGTTATgggaggatgtcaaacatgaagaccctatgacagcatgttcaag  
116 gacagaaggaaggccagtactgccagacagaagtgag-3', were used as a transgene, respectively. We  
117 also used 5'-acattatacgaagttaggtgcaatct-3' and 5'-gctatacgaagttatcacacctaacc-3' primers  
118 for genotyping PCR. All DNA and RNA oligos were purchased from Integrated DNA  
119 Technologies, Inc (Coralville, IA).

120

## 121 **Cre protein treatment**

122 Long PCR was performed using the primers 5'-ggtttcaggtggagagctgt-3' and 5'-  
123 cagagtcagagatgtcgtcca-3' for the genome of the CaMK1 floxed mice. The Purified PCR  
124 product was treated with Cre recombinase as described in the instructions (M0298, New

125 England Biolabs, Ipswich, MA). The CaMK1 floxed PCR product and control plasmid (pLOX)  
126 were incubated at 37°C for 30 minutes with or without the Cre protein. Then the Cre was  
127 denatured at 70°C for 10 minutes. DNA cleavage was confirmed by electrophoresis.

128

## 129 **Declarations**

### 130 **Ethics approval and consent to participate.**

131 All animal experiments were conducted according to the guidelines and the rules of the  
132 Institutional Animal Care and Use Committee of Max Planck Florida Institute for  
133 Neuroscience. The experimental protocol was approved (Approval Number: 19-001).

134

### 135 **Consent for publication**

136 Not applicable.

137

### 138 **Availability of data and materials**

139 The authors declare that all data supporting the findings of this study are available within  
140 the article.

141

### 142 **Competing interests**

143 The authors declare that they have no competing interests.

144



145 **Funding**

146 This study was funded by NIH (R01MH080047, R35NS116804).

147

148 **Authors' contributions**

149 H.N. and R.Y. designed the studies and performed the analysis of the results. H.N. and Y.H.  
150 were responsible for the actual genome-edited knock-in mouse generation and genome  
151 analysis. Y.N. designed the knock-in constructs and did the experiments. Y.I. analyzed the  
152 experimental results and revised the manuscript. All authors read and approved the final  
153 manuscript.

154

155 **Acknowledgements**

156 We would like to thank Amanda Coldwell, Elizabeth Garcia, and Idris El-Amin for the care  
157 and management of the animals.

158

159

## References

1. Tsien JZ, Chen DF, Gerber D, Tom C, Mercer EH, Anderson DJ, et al. Subregion- and cell type-restricted gene knockout in mouse brain. *Cell*. 1996;87:1317–26. doi:10.1016/S0092-8674(00)81826-7.
2. Silva AJ, Paylor R, Wehner JM, Tonegawa S. Impaired spatial learning in  $\alpha$ -calcium-calmodulin kinase II mutant mice. *Science* (80- ). 1992;257:206–11. doi:10.1126/science.1321493.
3. Capecchi MR. Gene targeting in mice: Functional analysis of the mammalian genome for the twenty-first century. *Nature Reviews Genetics*. 2005;6:507–12. doi:10.1038/nrg1619.
4. Carstea AC. Germline competence of mouse ES and iPS cell lines: Chimera technologies and genetic background. *World J Stem Cells*. 2009;1:22. doi:10.4252/wjsc.v1.i1.22.
5. Kaneko T, Mashimo T. Simple genome editing of rodent intact embryos by electroporation. *PLoS One*. 2015;10:e0142755. doi:10.1371/journal.pone.0142755.
6. Qin W, Dion SL, Kutny PM, Zhang Y, Cheng AW, Jillette NL, et al. Efficient CRISPR/cas9-mediated genome editing in mice by zygote electroporation of nuclease. *Genetics*. 2015;200:423–30. doi:10.1534/genetics.115.176594.
7. Gurumurthy CB, Sato M, Nakamura A, Inui M, Kawano N, Islam MA, et al. Creation of CRISPR-based germline-genome-engineered mice without ex vivo handling of zygotes by i-GONAD. *Nat Protoc*. 2019;14:2452–82. doi:10.1038/s41596-019-0187-x.
8. Nishizono H, Yasuda R, Laviv T. Methodologies and Challenges for CRISPR/Cas9 Mediated Genome Editing of the Mammalian Brain. *Front Genome Ed*. 2020;2:602970. doi:10.3389/fgeed.2020.602970.
9. Quadros RM, Miura H, Harms DW, Akatsuka H, Sato T, Aida T, et al. Easi-CRISPR: A robust method for one-step generation of mice carrying conditional and insertion alleles using long ssDNA donors and CRISPR ribonucleoproteins. *Genome Biol*. 2017;18. doi:10.1186/s13059-017-1220-4.
10. Liu Y, Du Y, Xie W, Zhang F, Forrest D, Liu C. Generation of conditional knockout mice by sequential insertion of two loxP sites in cis using CRISPR/Cas9 and single-stranded DNA oligonucleotides. In: *Methods in Molecular Biology*. Humana Press Inc.; 2019. p. 191–210. doi:10.1007/978-1-4939-8831-0\_11.
11. Horii T, Morita S, Kimura M, Terawaki N, Shibutani M, Hatada I. Efficient generation of conditional knockout mice via sequential introduction of lox sites. *Sci Rep*. 2017;7:1–8. doi:10.1038/s41598-017-08496-8.

12. Gurumurthy CB, O'Brien AR, Quadros RM, Adams J, Alcaide P, Ayabe S, et al. Reproducibility of CRISPR-Cas9 methods for generation of conditional mouse alleles: A multi-center evaluation. *Genome Biol.* 2019;20. doi:10.1186/s13059-019-1776-2.
13. Schmitt JM, Guire ES, Saneyoshi T, Soderling TR. Calmodulin-dependent kinase kinase/calmodulin kinase I activity gates extracellular-regulated kinase-dependent long-term potentiation. *J Neurosci.* 2005;25:1281–90. doi:10.1523/JNEUROSCI.4086-04.2005.
14. Nishizono H, Darwish M, Uosaki H, Masuyama N, Seki M, Abe H, et al. Use of freeze-thawed embryos for high-efficiency production of genetically modified mice. *J Vis Exp.* 2020;2020:e60808. doi:10.3791/60808.
15. Bishop KA, Harrington A, Kouranova E, Weinstein EJ, Rosen CJ, Cui X, et al. CRISPR/Cas9-Mediated insertion of loxP sites in the mouse Dock7 gene provides an effective alternative to use of targeted embryonic stem cells. *G3 Genes, Genomes, Genet.* 2016;6:2051–61. doi:10.1534/g3.116.030601.

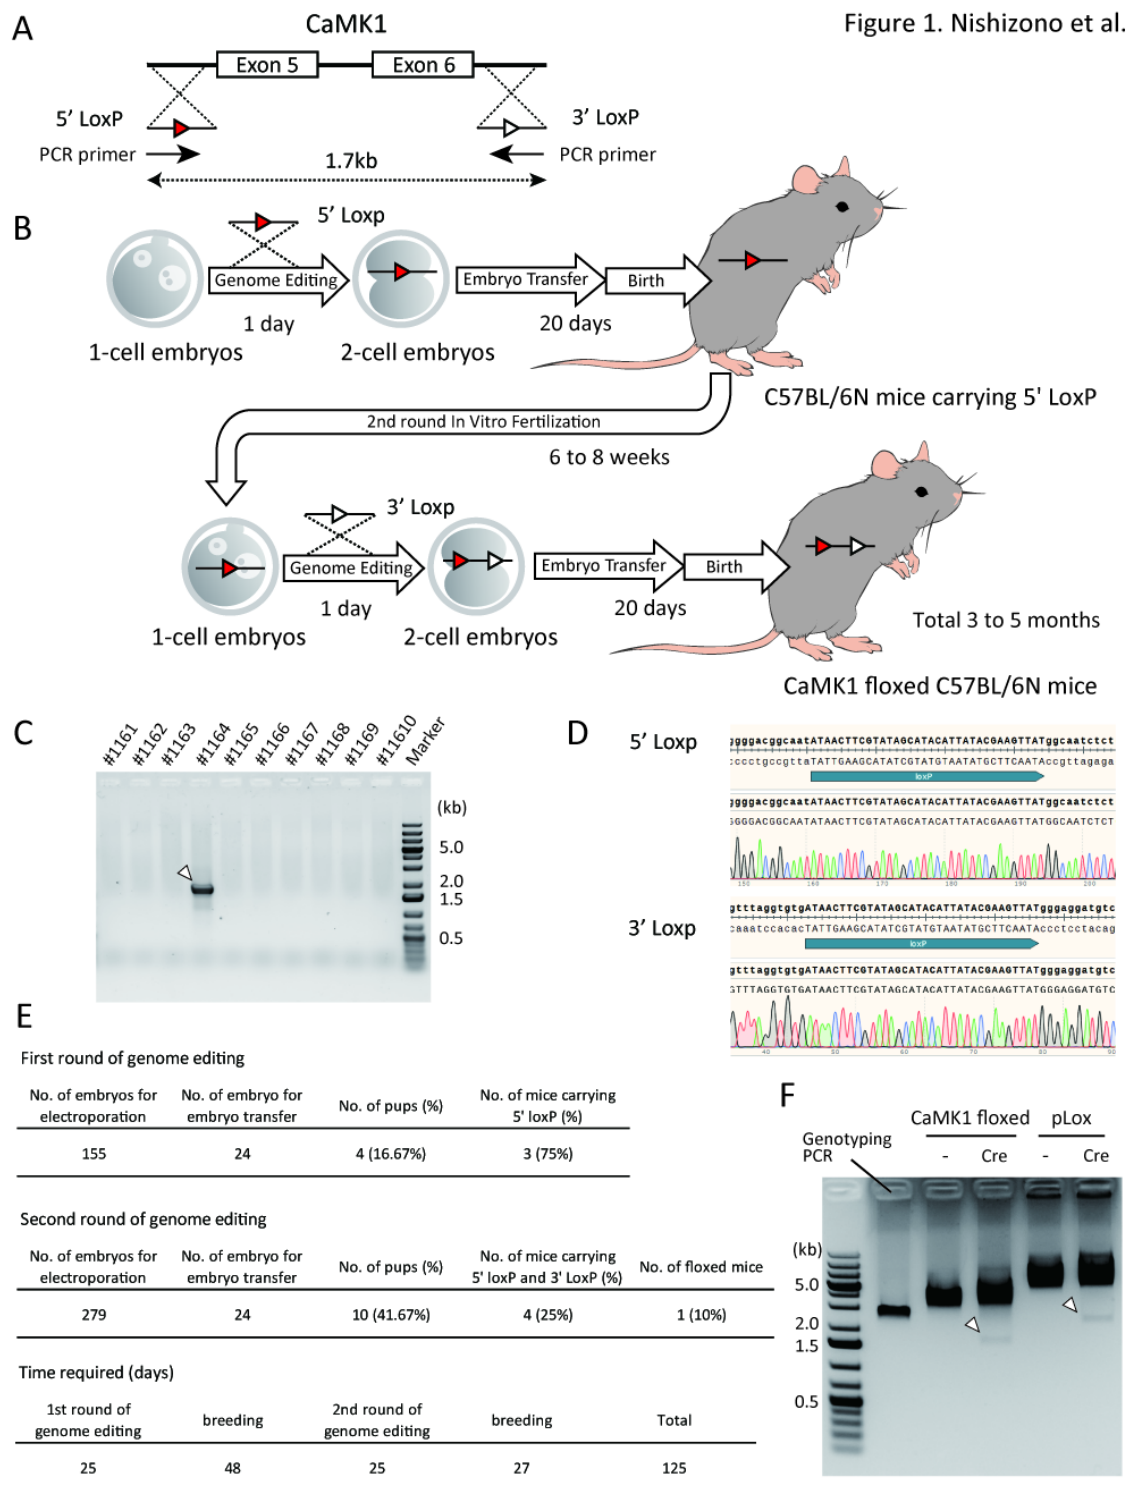

Figure 1. Nishizono et al.

## Figure legend

### Figure 1. Generation of CaMK1 floxed mice

(A) Diagram of the constructs. gRNAs and ssODNs were designed to introduce a 5'-side LoxP (5' LoxP) into the intron upstream of Exon 5 and a 3'-side LoxP (3' LoxP) into the intron downstream of Exon 6. The distance between the Loxps is 1.7 kb. (B) Scheme of sequential in vitro fertilization and genome editing over two generations. (C) PCR results of ten mice born after two rounds of genome editing. Arrowheads indicate target bands. (D) DNA sequencing around LoxP of CaMK1 floxed mouse (#1164). The upper panel is around 5' LoxP, and the lower panel is around 3' LoxP. No deletion site or mismatch could be identified. (E) Detailed results of the first and second rounds of genome editing. (F) Results of Cre protein treatment of the PCR product from CaMK1 floxed mouse genome. Arrowheads indicate the excised DNA. Cre; Cre protein treated group, -; Cre protein non-transfected group pLOX; control DNA (pLOX) was used instead of the PCR product from CaMK1 floxed mouse genome.
